# Supplementary material
Source: PubMed Central journal article supplement (PMC4248885)
Supplement: JVI.02079-14_zjv999099697so1.pdf [file JVI.02079-14_zjv999099697so1.pdf]

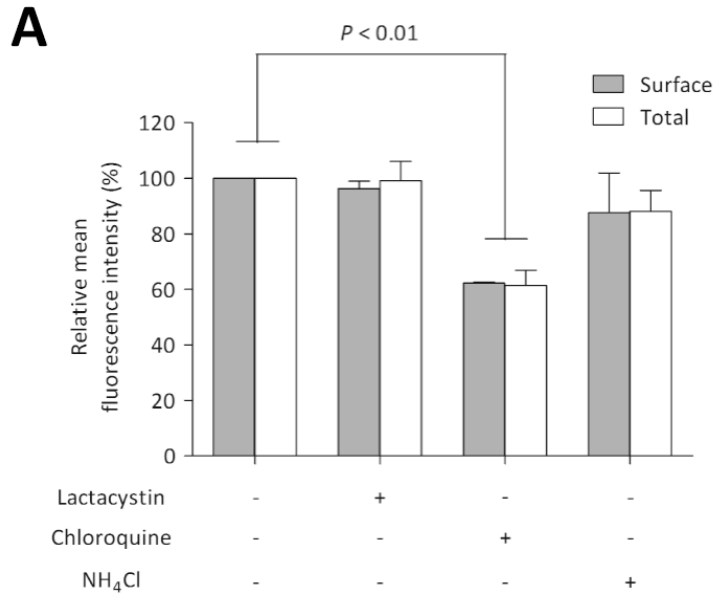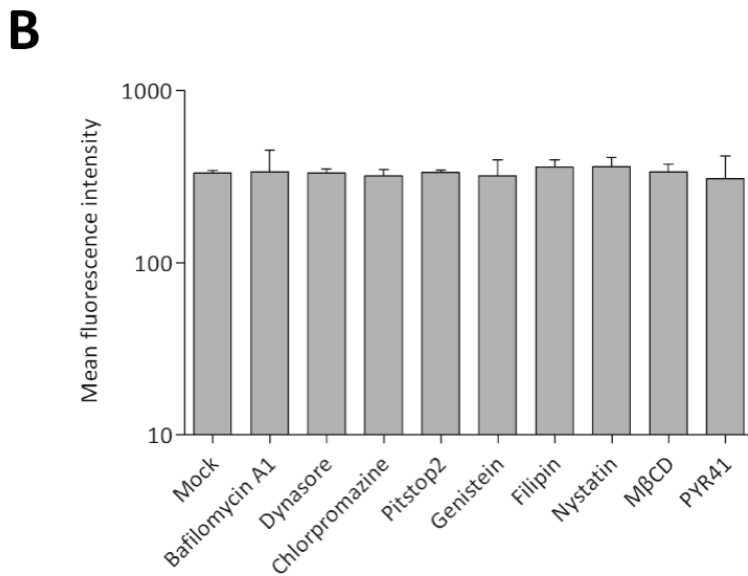

**Supplementary Figure S1.** Effects of inhibitors on the turnover of MHC-I in uninfected cells. NBL6 cells were treated with the following inhibitors: (A) 5  $\mu$ M lactacystin, 150  $\mu$ M chloroquine and 10 mM NH<sub>4</sub>Cl. (B) 2  $\mu$ M bafilomycin A1, 80  $\mu$ M Dynasore, 10  $\mu$ g/ml chlorpromazine, 10  $\mu$ M Pitstop2, 50  $\mu$ g/ml genistein, 5  $\mu$ g/ml filipin, 20  $\mu$ g/ml nystatin, 20 mM M $\beta$ CD and 10  $\mu$ M PYR41. After inhibition for 4 h, cells were suspended and reacted with mAb anti-MHC-I, followed by staining with Alexa Fluor 647-conjugated goat anti-mouse IgG. To detect total levels of MHC-I, cells were fixed in 3.5% PFA and permeablized in PBS supplemented with 0.02% saponin before proceeding to incubation with primary antibody. Expression levels of MHC-I were detected by flow cytometry. Data were obtained from three independent experiments and presented as means  $\pm$  standard deviation.
